# Supplementary material
Source: PubMed Central journal article supplement (PMC9468947)
Supplement: jamainternmed-e223946-s003.pdf [file jamainternmed-e223946-s003.pdf]

## Data Sharing Statement

Desai. Effects of Real-Time Prescription Benefit Recommendations on Patient Out-of-Pocket Costs. *JAMA Intern Med.* Published September 12, 2022.  
doi:10.1001/jamainternmed.2022.3946

### Data

**Data available:** No
